# Supplementary material
Source: PubMed Central journal article supplement (PMC4119105)
Supplement: 10-1055-s-0034-1368643-sup_gf810.pdf [file 10-1055-s-0034-1368643-sup_gf810.pdf]

# Replik auf die Leserbriefe von W. Kühn et al. sowie von H. Griesser, K. Marquardt und B. Jordan zur „Stellungnahme zur Veröffentlichung der ‚Münchener Nomenklatur III‘ von der Koordinations-Konferenz Zytologie“ (Geburtsh Frauenheilk 2014; 74: 242–243)

Response to the Letters from W. Kühn et al. and H. Griesser, K. Marquardt and B. Jordan on “Comments to the Publication of Munich Nomenclature III by the Cytology Coordination Conference” (Geburtsh Frauenheilk 2014; 74: 242–243)

**Autoren**

**P. Hillemanns, A. Schneider**

**Institut**

Klinik für Frauenheilkunde und Geburtshilfe, Medizinische Hochschule Hannover, Hannover

Mit der Etablierung einer neuen zytologischen Nomenklatur ist ein wichtiger, schon seit Langem überfälliger Schritt vollzogen worden. Die zytologischen Gesellschaften hatten hierüber schon seit vielen Jahren diskutiert. Der Leiter der S3-Leitlinie Prävention des Zervixkarzinoms hatte im Rahmen der Agenda-Erstellung für die Leitlinie darauf hingewiesen, dass eine Aktualisierung der Münchener Nomenklatur II dringend erforderlich ist, auch um eine Adaptation internationaler Studienergebnisse für den deutschen Kontext zu ermöglichen. Dieser Empfehlung schloss sich die Leitliniengruppe an, verankerte diese Empfehlung in den PICO-Fragen und forderte die Mandatsträger der zytologischen Gesellschaften auf, eine Modernisierung der zytologischen Nomenklatur zügig umzusetzen. Nach Vortrag des Sachstandes durch P.H. in der Vorstandssitzung der DGGG am 9.11.2012 schloss sich auch die DGGG dieser Empfehlung an, eine Revision der Münchener Nomenklatur zu unterstützen.

Sehr wichtig ist jedoch bei der Etablierung von neuen morphologischen Nomenklaturen die Beteiligung möglichst vieler Fachgesellschaften und Arbeitsgemeinschaften, um nach ausführlicher Diskussion einen breiten Konsens schon im Vorfeld zu erzielen. So nahmen am Workshop 2001 für die modifizierte Bethesda-Nomenklatur 400 Teilnehmer aus 20 Ländern teil, einschließlich eines Internet Bulletin Boards mit 1000 Kommentaren zum neuen System. Hier kann man von den Amerikanern lernen und nur so kann wie in der 2. Schlussfolgerung von München III potenziell „die Kommunikation zwischen Zytologen, Gynäkologen und Patientinnen verbessert werden“. Zudem wird in der ersten Schlussfolgerung Sensitivität mit positivem Vorhersagewert verwechselt: eine neue Nomenklatur kann bei identischer Untersuchungsmethode nicht die Sensitivität der Methode verbessern. Somit bleiben alle 4 Schlussfolgerungen im München-III-Artikel rein hypothetisch und werden dem Leser als bewiese-

ne Vorteile der neuen Nomenklatur verkauft. Dies widerspricht den Grundsätzen von evidenzbasierter Medizin und darf so nicht stehenbleiben. Beide Leserbriefe gehen aber auf diesen entscheidenden Punkt nicht ein.

Die beiden Leserschriften bestätigen uns in der Überzeugung, dass eine Nomenklatur diskutiert werden darf und soll. Wir hatten unseren in dieser Zeitschrift abgedruckten Kommentar ursprünglich beim *Frauenarzt* als Leserbrief eingereicht. *Der Frauenarzt* hat jedoch eine Publikation abgelehnt, wie er dies seit Jahren bei ähnlichen Themen und Personen zu tun pflegt, und hält sich in keiner Weise an das übliche Vorgehen in einer wissenschaftlichen Community.

Wir begrüßen die differenzierten Aussagen im Leserbrief von W. Kühn et al. zur alten Gruppe IIw und IIID und zu einer Separierung einer CIN 2 von einer CIN 3 (im Gegensatz zum amerikanischen Vorgehen), da CIN 2 eine andere biologische Bedeutung hat. Wir haben auch nicht die Aufnahme der glandulären Veränderungen in die Münchener Nomenklatur III infrage gestellt, obgleich diese differenzierte Subkategorisierung der glandulären Veränderungen in 8 Gruppen (5 endozervikal, 3 endometrial) Zytologen und Gynäkologen überfordert und zweifelsohne einer wissenschaftlichen Auswertung in den nächsten Jahren bedarf. Nur am Rande möchten wir anmerken, dass der HPV-Nachweis die einzige Methode ist, die bei Diagnose „endometrioides Adenokarzinom“ eine Allokation des Primärtumors zu Zervix oder Endometrium erlaubt.

Die Kolposkopie ist unbestritten die wichtigste Methode in der Abklärung von Frauen mit auffälligen Befunden, aber je älter die Patientinnen, umso häufiger haben sie eine Transformationszone Typ3, wo die Kolposkopie nicht weiterhilft. Die ASCPC Consensus Guidelines zum Vorgehen bei atypischen zytologischen und HPV-positiven Befunden sind 29 Seiten lang und enthalten 17 Algorithmen, deren Komplexität in den kli-

## Bibliografie

**DOI** <http://dx.doi.org/10.1055/s-0034-1368643>  
Geburtsh Frauenheilk 2014; 74:  
1–2 © Georg Thieme Verlag KG  
Stuttgart · New York ·  
ISSN 0016-5751

## Korrespondenzadresse Prof. Dr. med.

**Peter Hillemanns**  
Klinik für Frauenheilkunde  
und Geburtshilfe  
Medizinische Hochschule  
Hannover  
Carl-Neuberg-Straße 1  
30625 Hannover  
Hillemanns.Peter@  
MH-Hannover.de

nischen Empfehlungen von München III nicht annähernd erfasst wird. Daher sollten sich die Zytologen künftig bei ihren Empfehlungen an den in Kürze zur Verfügung stehenden S3-Leitlinien orientieren und sich mit klinischen Empfehlungen in München III zurückhalten. Die Bemerkung im Leserbrief von Griesser et al., dass die München-III-Empfehlungen zur Befundabklärung deshalb notwendig seien, um in absehbarer Zeit aussagekräftige Abklärungsverfahren zu integrieren, ist unlogisch. Wenn es noch nicht klar ist, welche Abklärungsmethoden angewendet werden sollen, dann wäre es sinnvoller, wenn man auf die S3-Leitlinien verweist. Diese werden mit einem erheblichen Aufwand und finanzieller/organisatorischer Unterstützung durch das Leitlinienprogramm Onkologie (Deutsche Krebsgesellschaft, Deutsche

Krebshilfe, AWMF) mit repräsentativer Besetzung durch diverse Fachgesellschaften und methodischer Unterstützung durch 2 international renommierte Fachinstitute für Metaanalysen und GRADE Interpretation transparent erarbeitet und der aktuellen wissenschaftlichen Datenlage immer wieder neu angepasst. Zusammenfassend möchten wir feststellen, dass die Münchner Nomenklatur III eine potenzielle Verbesserung darstellt und es sinnvoll wäre, dies auch zu messen. Wir hoffen ebenfalls auf eine breite Akzeptanz und Umsetzung mit kontinuierlicher Überprüfung wichtiger Qualitätsparameter, die auch noch definiert werden sollten. Kritik ist wichtig für einen wissenschaftlichen Diskurs und dient dem positiv besetzten Streben nach Verbesserung.

Dieser Artikel bezieht sich auf:

Geburtsh Frauenheilk 2014; 74: 242–243
